# Supplementary material for: Redox activation of ATM enhances GSNOR translation to sustain mitophagy and tolerance to oxidative stress
Source: PubMed Central journal article supplement (PMC7788447; doi:10.15252/embr.202050500), 2020-11-27
Supplement: EMBR-22-e50500-s002.pdf [file EMBR-22-e50500-s002.pdf]

## Expanded View Figures

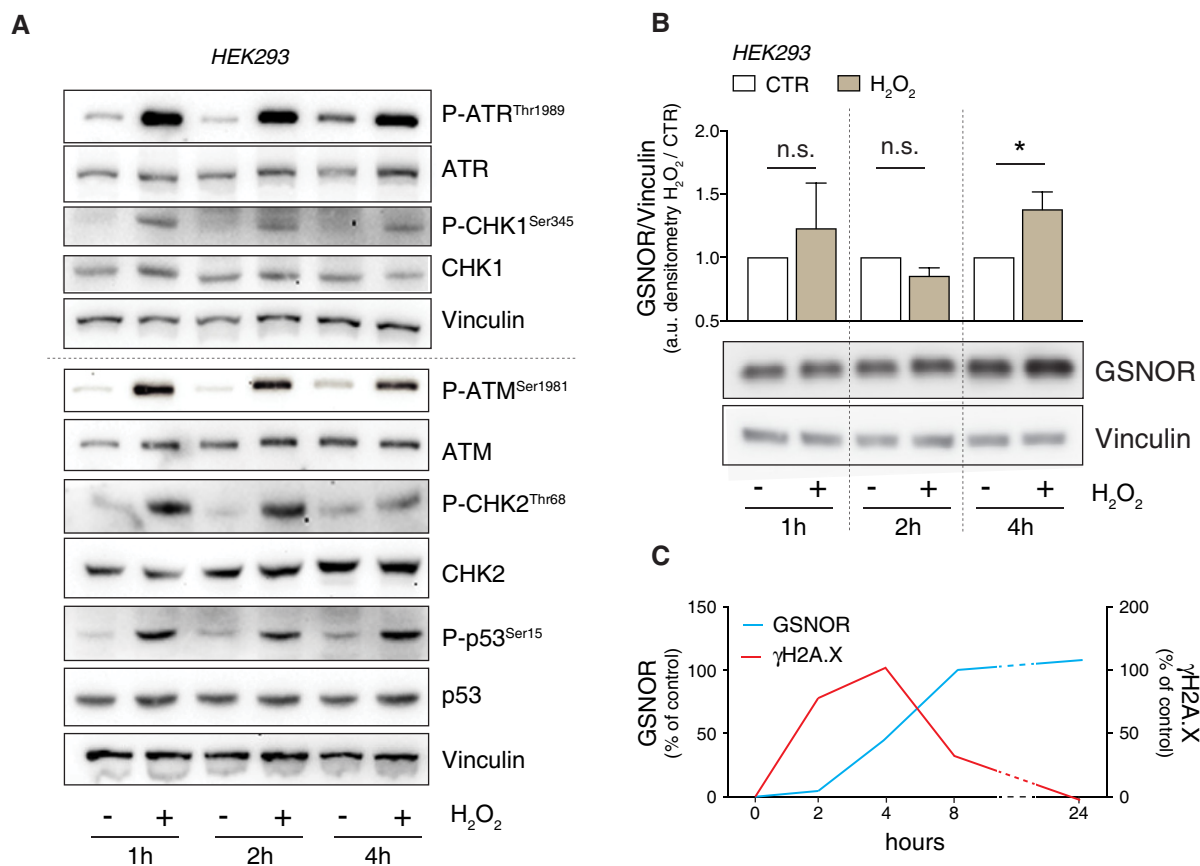

**Figure EV1. H<sub>2</sub>O<sub>2</sub> rapidly induces ATR/CHK1 and ATM/CHK2 signaling axes, but not GSNOR.**

- A HEK293 cells were treated for 1, 2 and 4 h with 100 μM H<sub>2</sub>O<sub>2</sub>. Vinculin was used as loading control. Basal and phospho-active forms of ATM, CHK2, ATR, CHK1, and p53 were assessed by Western blot.
- B Western blot analysis performed in the same experimental setting described in panel A. Vinculin was used as loading control. Densitometry of GSNOR immunoreactive bands is normalized to Vinculin and expressed as arbitrary units. Values shown are the means ± SD of *n* = 3 different experiments. \**P* < 0.05; n.s., not significant.
- C Integrated time-dependent profiles of GSNOR (extracted from combining data of Figs EV1B and 1A) and phospho-histone H2AX (extracted from Fig 2B) were evaluated in HEK293 cells treated with 100 μM H<sub>2</sub>O<sub>2</sub>. Data are expressed as % of control (untreated cells).

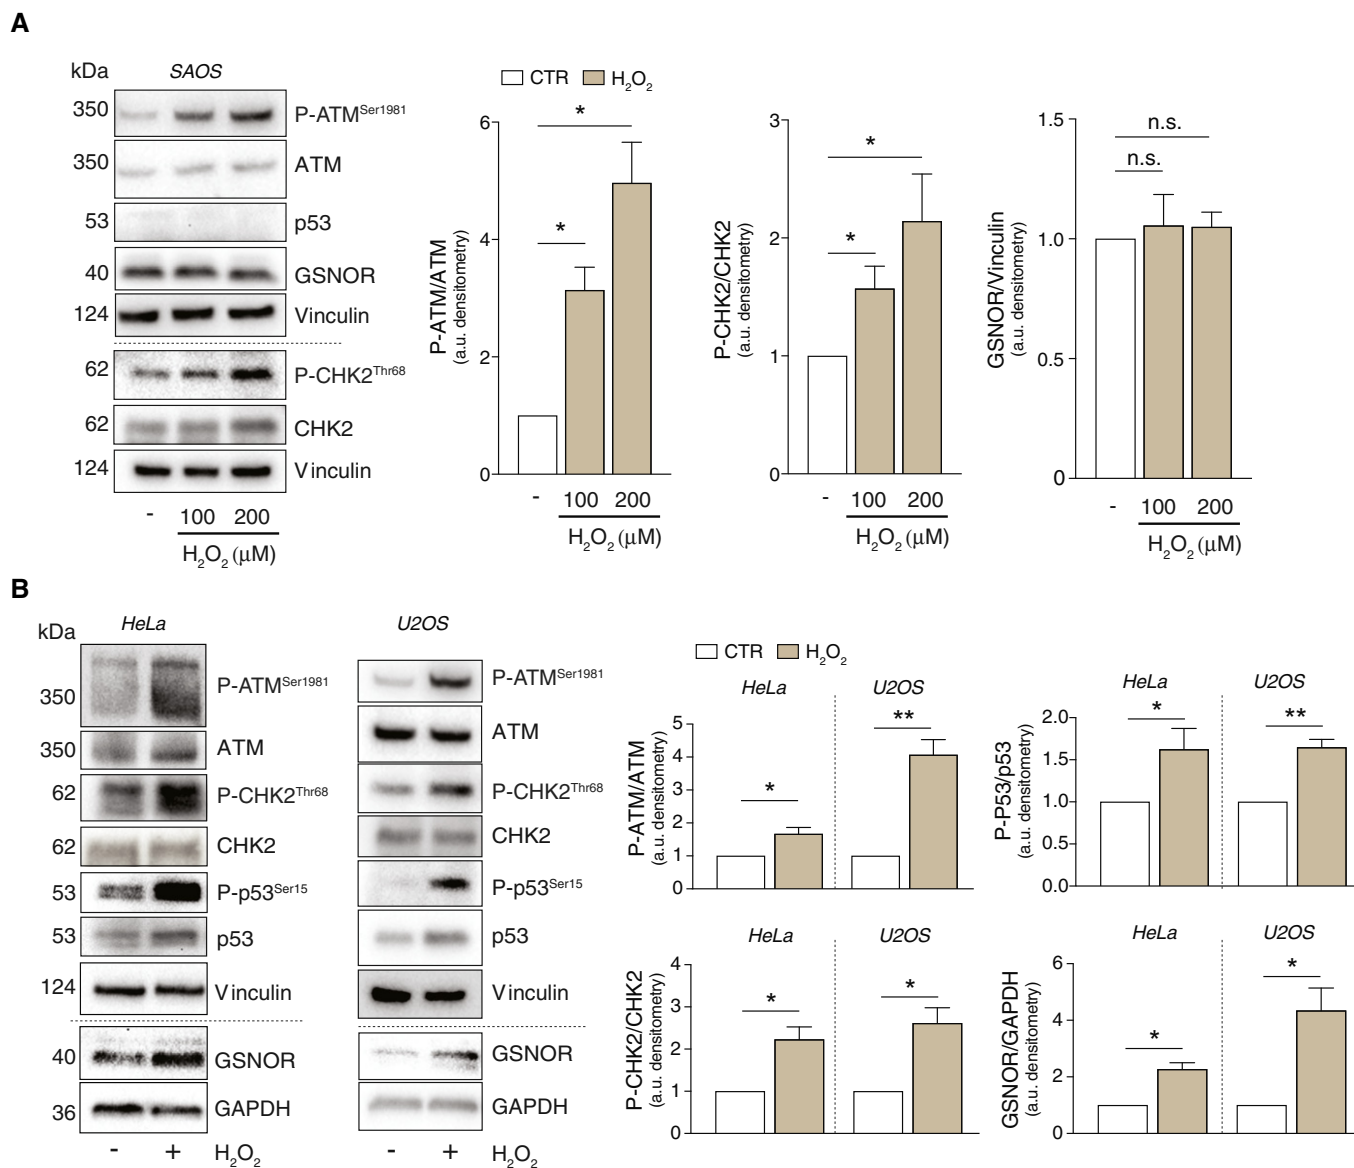

**Figure EV2. GSNOR is induced by H<sub>2</sub>O<sub>2</sub> in p53 expressing cells.**

A, B SAOS (A), HeLa, and U2OS cells (B) were treated for 24 h with 100 or 200  $\mu$ M H<sub>2</sub>O<sub>2</sub>. Basal and phospho-active forms of ATM, CHK2, and p53 and GSNOR were assessed by Western blot. Phospho:basal level ratios of ATM, CHK2 and p53 (normalized to Vinculin), along with densitometry of GSNOR immunoreactive bands (normalized to GAPDH), are expressed as arbitrary units. Values shown represent the means  $\pm$  SD of  $n = 3$  different experiments. \* $P < 0.05$ ; \*\* $P < 0.01$ ; *n.s.*, not significant.

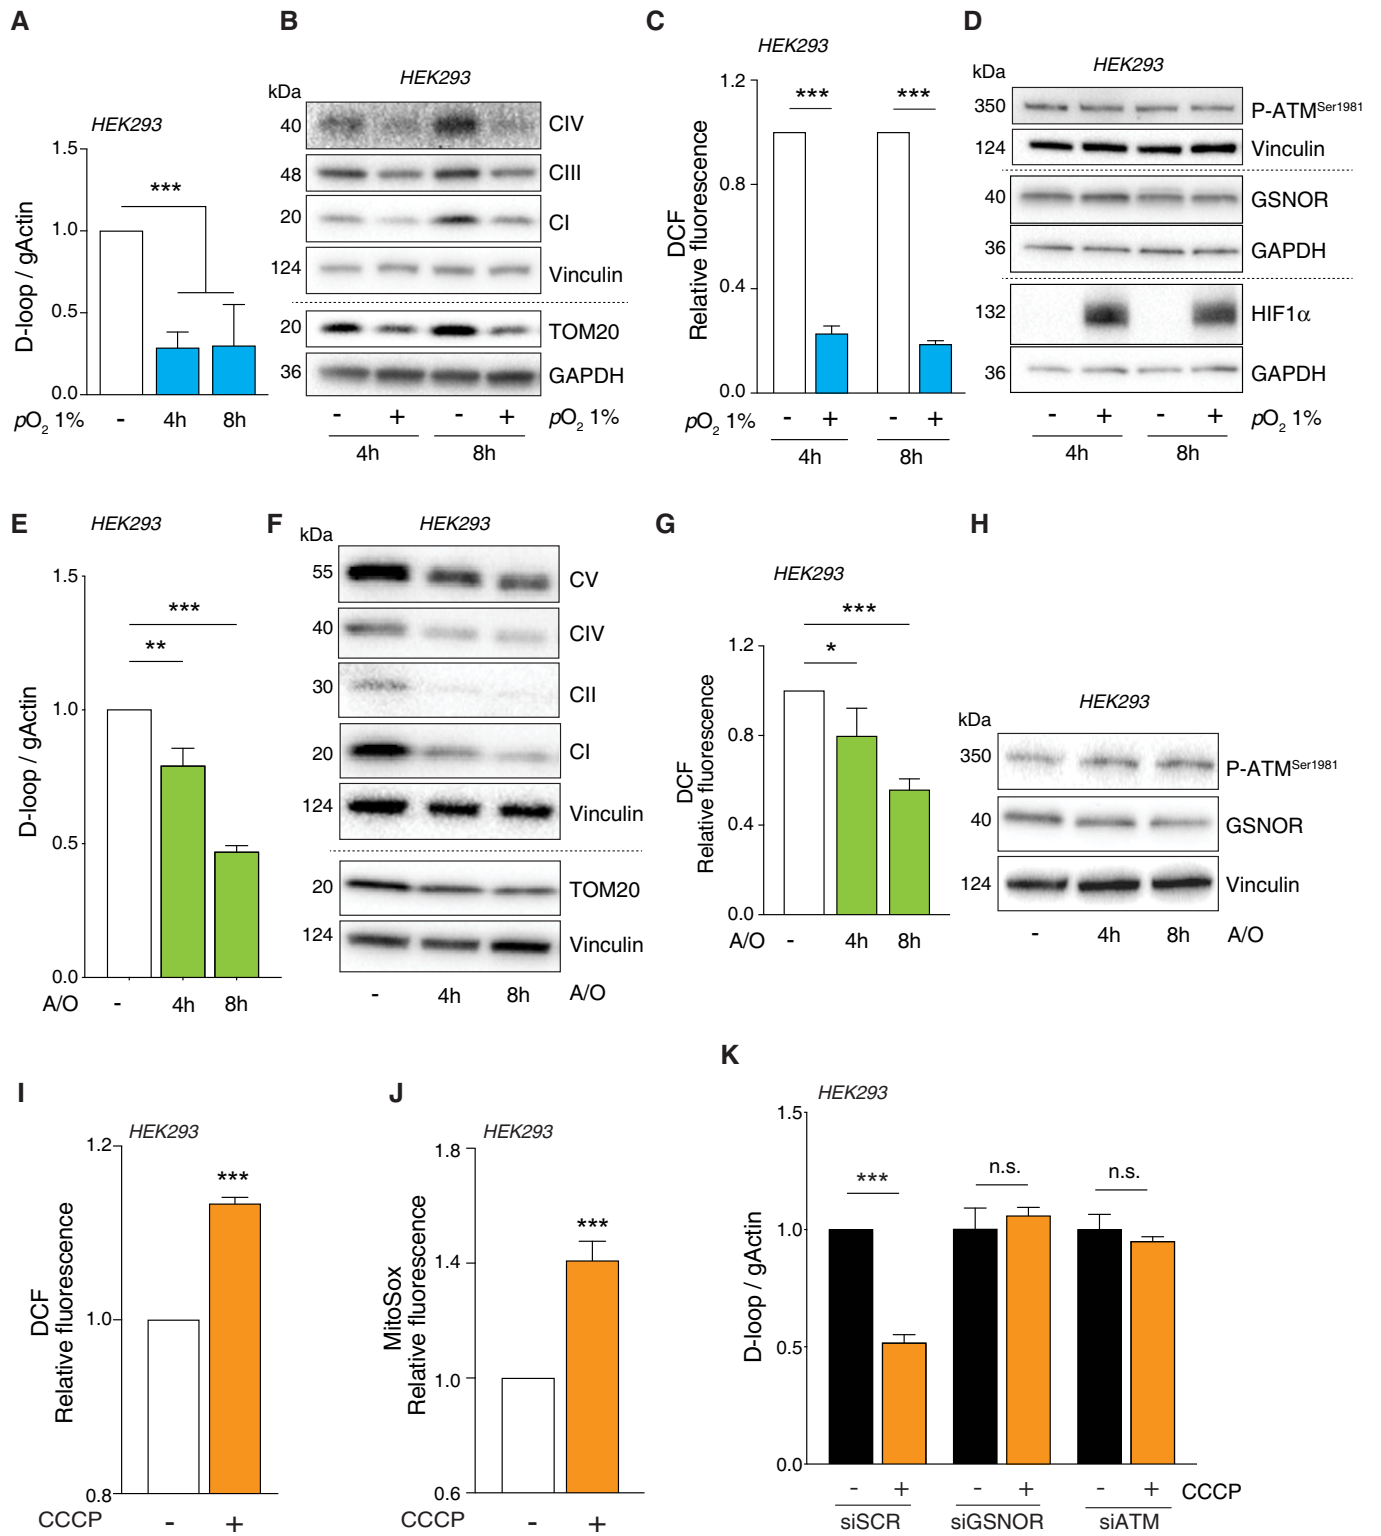

Figure EV3.

**Figure EV3. Mitophagy is kept sustained by ATM/GSNOR axis as a selective response to H<sub>2</sub>O<sub>2</sub>.**

A–D HEK293 cells were subjected to hypoxia (i.e.,  $pO_2 = 1\%$ ) for 4 and 8 h. (A) Mitophagy was assayed by RT–qPCR relative quantitation of D-loop (selected as measure of mtDNA). Results shown are the means  $\pm$  SD of  $n = 6$  independent experiments.  $***P < 0.001$  calculated with respect to cells kept in normoxic conditions. (B) Mitophagy was also evaluated by Western blot of TOM20 and different mitochondrial complex subunits, i.e., NDUFB8 (CI), SDHB (CII), and MTCO2 (complex IV). Vinculin and GAPDH were used as loading controls. (C) After treatment, cells were incubated with 2',7'-H<sub>2</sub>DCF-DA to cytofluorometrically assess the intracellular production of H<sub>2</sub>O<sub>2</sub>. Values are shown as units of DCF fluorescence relative to cells maintained in normoxic conditions (arbitrarily set as 1) and represent the means  $\pm$  SD of  $n = 3$  independent experiments.  $***P < 0.001$ . (D) Western blot analysis of phospho-ATM and GSNOR. HIF1 $\alpha$  was selected as marker of hypoxia. Vinculin and GAPDH were used as loading controls.

E–H HEK293 cells were treated for 4 and 8 h with 1  $\mu$ M of a combination of oligomycin and antimycin. Mitophagy was evaluated by (E) D-loop quantitation as described in panel A. Results shown represent the means  $\pm$  SD of  $n = 3$  independent experiments.  $**P < 0.01$  and  $***P < 0.001$  with respect to untreated cells. (F) Western blot of different mitochondrial proteins (as in panel B). Vinculin was used as loading control. (G) H<sub>2</sub>O<sub>2</sub> production was evaluated cytofluorometrically as described in panel C. Results shown represent the means  $\pm$  SD of  $n = 3$  independent experiments.  $*P < 0.05$ ;  $***P < 0.01$  with respect to untreated cells. (H) Western blot analysis of phospho-ATM and GSNOR. Vinculin and GAPDH was used as loading control.

I–K HEK293 cells were treated for 8 h with 10  $\mu$ M CCCP. After treatment, cells were incubated with 5  $\mu$ M 2',7'-H<sub>2</sub>DCF-DA (I) or MitoSox (J) to evaluate the production of H<sub>2</sub>O<sub>2</sub> or mitochondrial superoxide, respectively. Values are shown as units of DCF or MitoSox fluorescence relative to untreated cells (arbitrarily set as 1) and represent the means  $\pm$  SEM (I) or SD (J) of  $n = 3$  independent experiments.  $***P < 0.001$  with respect to untreated cells. (K) Before CCCP treatment, cells were transfected for 48 h with siRNA against ATM (siATM), GSNOR (siGSNOR), or control siRNA (*scramble*, siScr). Mitophagy was assessed by RT–qPCR relative quantitation of D-loop. Results shown are the means  $\pm$  SD of  $n = 3$  experiments run in triplicate.  $***P < 0.001$ ; *n.s.*, not significant, calculated with regard to untreated cells.

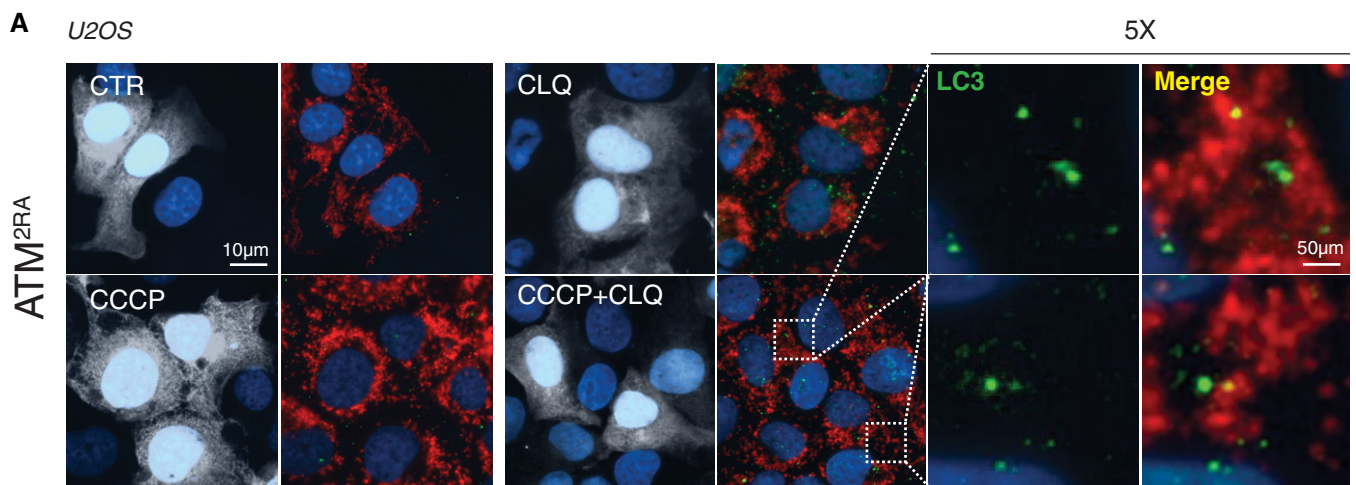

Transfected cells  
 Hoechst  
 TOM20  
 LC3

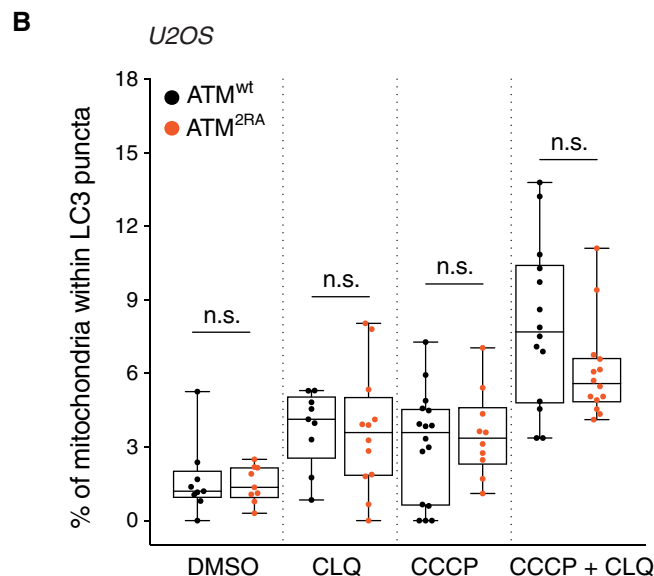

Figure EV4.

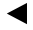**Figure EV4. The DNA damage-unresponsive ATM mutant (ATM<sup>2RA</sup>) does not affect mitophagy induced by CCCP.**

- A ATM<sup>2RA</sup> U2OS cells were treated for 8 h with 1  $\mu$ M CCCP and incubated with chloroquine (CLQ) to enhance differences in mitophagy. Anti-TOM20 (red) was used to visualize mitochondria; anti-LC3 (green) was used to identify autophagosomes.
- B Percentage of mitochondria merging with LC3-positive puncta calculated by Fiji analysis software using the open-source plugin ComDet v. 0.3.7. Values are expressed as % of mitochondria (TOM20<sup>+</sup> particles) co-localizing with LC3/cell and graphed as boxes (25<sup>th</sup>–75<sup>th</sup> interquartile range) and whiskers (minimum to maximum showing all points), with central bands representing the median of  $n \geq 9$  different cells. *n.s.*, not significant.
